# Supplementary material for: Compositional, thermal and water sorption properties of wheat flour: comparing wild-relatives v/s elite wheat varieties used in current plant breeding
Source: Royal Society of Chemistry journal article supplement (doi:10.1039/d0fo02223c), 2021-01-01
Supplement: d0fo02223c1.pdf [file d0fo02223c1.pdf]

1 **Compositional, thermal and water sorption properties of wheat flour:**  
2 **comparing wild-relatives v/s elite wheat varieties used in current plant**  
3 **breeding**

4 Deepa Agarwal<sup>a,c\*</sup>, William MacNaughtan<sup>a</sup>, Julie King<sup>b</sup>, Tim J. Foster<sup>a+</sup>

5 <sup>a</sup> *Division of Food, Nutrition and Dietetics, School of Biosciences, University of Nottingham,*  
6 *Sutton Bonington Campus, Loughborough, LE12 5RD, UK.*

7 <sup>b</sup> *Division of Plant Sciences, School of Biosciences, University of Nottingham, Sutton*  
8 *Bonington Campus, Loughborough, LE12 5RD, UK.*

9 <sup>c</sup> *The New Zealand Institute of Plant and Food Research, Canterbury Agriculture & Science*  
10 *Centre, 74, Gerald St, Lincoln, 7608, New Zealand.*

11 \* Corresponding author email: [deepa.agarwal@plantandfood.co.nz](mailto:deepa.agarwal@plantandfood.co.nz)

12

13 **Supplementary Data**

14 *Supplementary Tables:*

15 **Table T1:** *Assignments of the different absorbance bands in FTIR spectra of wheat flour*  
16 *(Gorgulu et al., 2007, Naumann et al., 2000, Yu et al., 2007, Singh et al., 2011, Liu et al., 2005,*  
17 *Robert et al., 2005, Moroi et al., 2011, Saulnier et al., 2009, Kizil et al., 2002, Akerholm et al.,*  
18 *2004).*

| Wavelength (cm <sup>-1</sup> ) | Band Assignments                                                                                                   |
|--------------------------------|--------------------------------------------------------------------------------------------------------------------|
| 3500–3300                      | OH-N-H stretching vibrations: water, carbohydrates, proteins                                                       |
| 3008                           | Olefinic =CH                                                                                                       |
| 2959                           | CH <sub>3</sub> asymmetric stretching: mainly lipids with contribution from proteins, carbohydrates, nucleic acids |
| 2923                           | CH <sub>2</sub> asymmetric stretching: mainly lipids with contribution from proteins, carbohydrates, nucleic acids |
| 2872                           | CH <sub>3</sub> symmetric stretching: mainly proteins with contribution from lipids, carbohydrates, nucleic acids  |
| 2852                           | CH <sub>2</sub> symmetric stretching: mainly lipids with contribution from proteins, carbohydrates, nucleic acids  |
| 1745                           | C=O ester stretching, lipids, carbohydrates                                                                        |
| 1642                           | Amide I (C=O stretching): proteins                                                                                 |
| 1540                           | Amide II (C-N stretching, N-H bending): mainly proteins                                                            |
| 1514                           | Lignin                                                                                                             |

|                        |                                                                       |
|------------------------|-----------------------------------------------------------------------|
| 1446                   | C-H: cell wall polysaccharides                                        |
| 1414                   | O-H bending: cell wall polysaccharides, alcohols and carboxylic acids |
| 1369, 1335, 1315, 1280 | Cellulose                                                             |
| 1239                   | Amide III (C-N and N-H stretching): mainly proteins                   |
| 1205                   | Cellulose                                                             |
| 1150                   | Starch                                                                |
| 1124                   | Starch                                                                |
| 1101                   | Pectin                                                                |
| 1076                   | $\beta$ -(1 - >6) or $\beta$ -(1 - >3) linked galactan                |
| 1049                   | Arabinogalactorhamnoglycan, starch                                    |
| 990                    | Arabinoxylans                                                         |
| 932                    | Starch                                                                |
| 859                    | Starch                                                                |

---

19

20 *Supplementary Figures:*

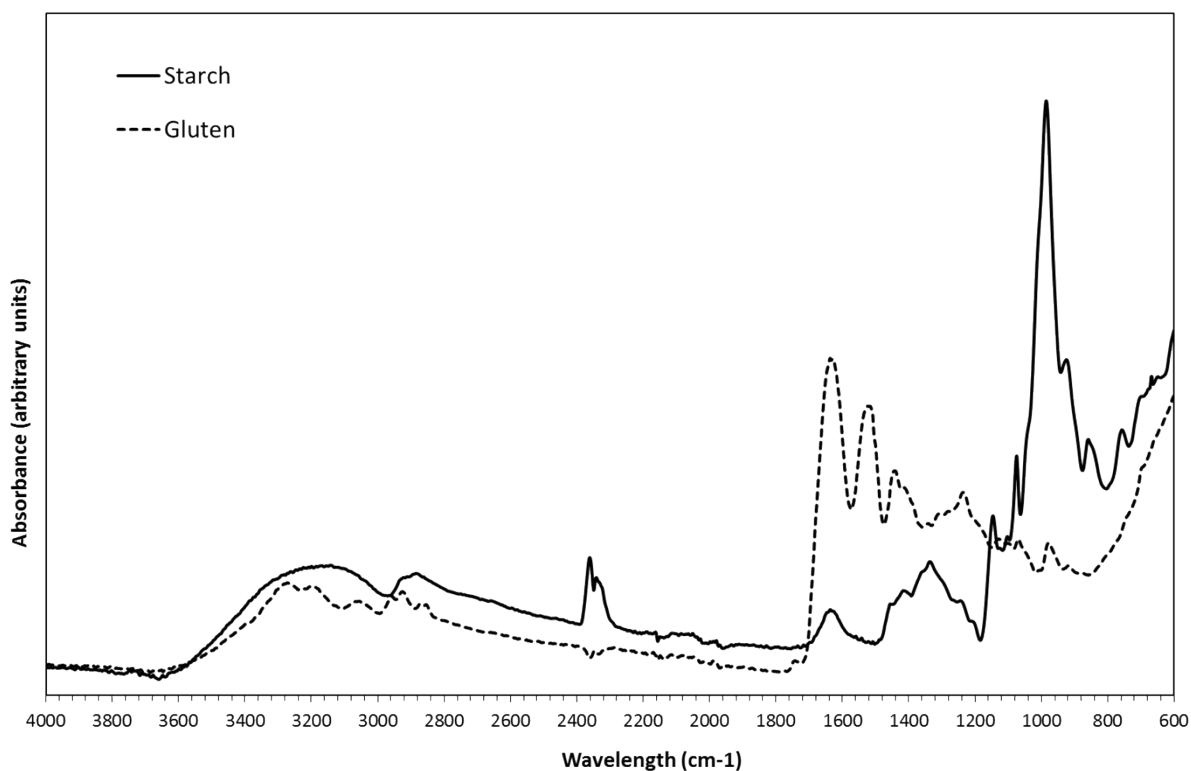

21

22 **Figure S1:** *The ATR-FTIR spectra (vector normalised) of wheat gluten (Sigma, UK) and native*  
 23 *wheat starch (Healy group, UK).*

24

25

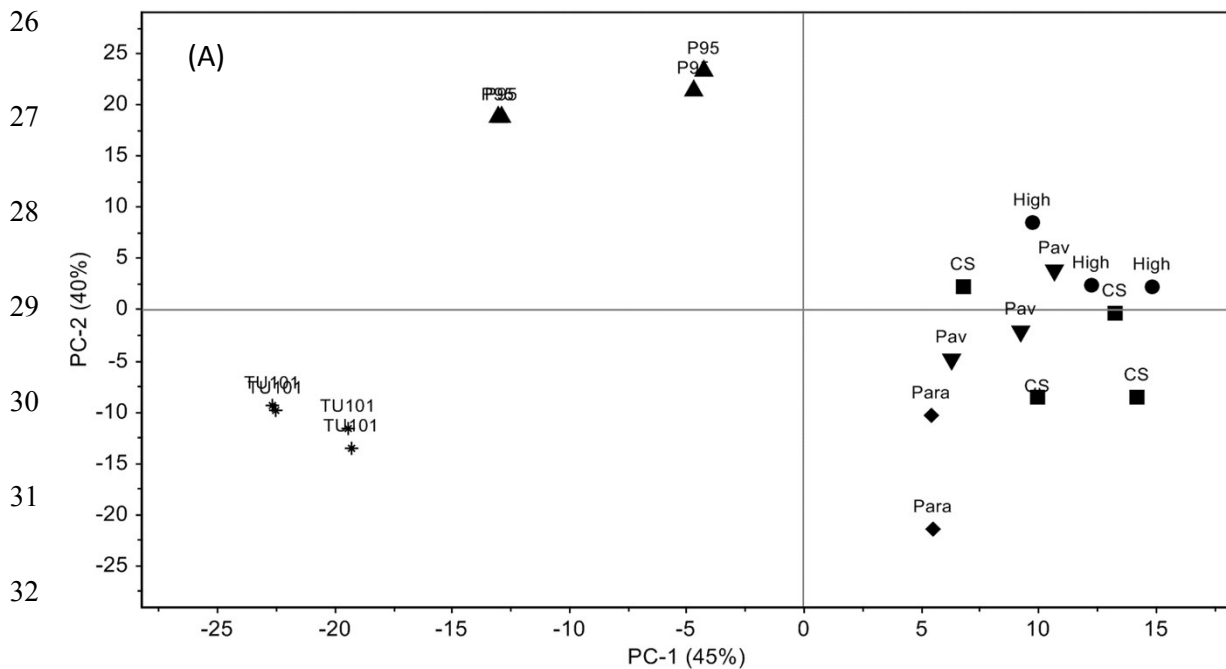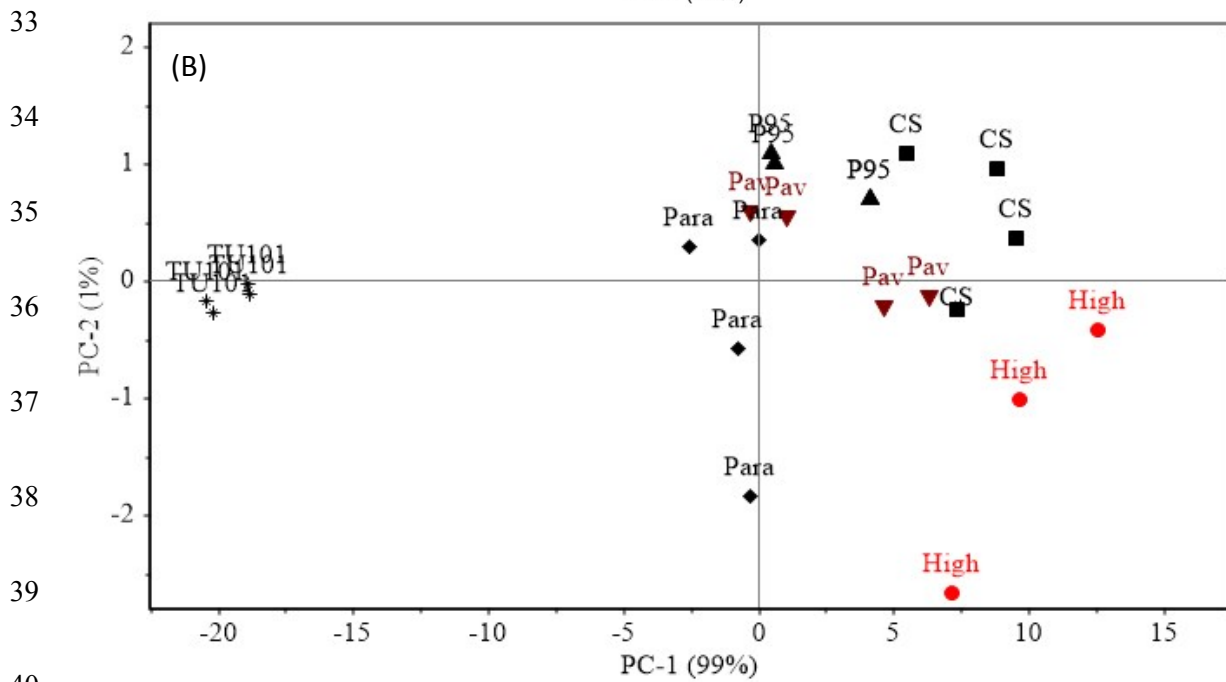

41 **Figure S2:** Principal component analysis (PC2 versus PC1) scores plot of the vector  
42 normalised spectra in the (a) carbohydrate region: 1200-600  $\text{cm}^{-1}$  range, and (b) lignin  
43 region: 1570-1482  $\text{cm}^{-1}$  range.

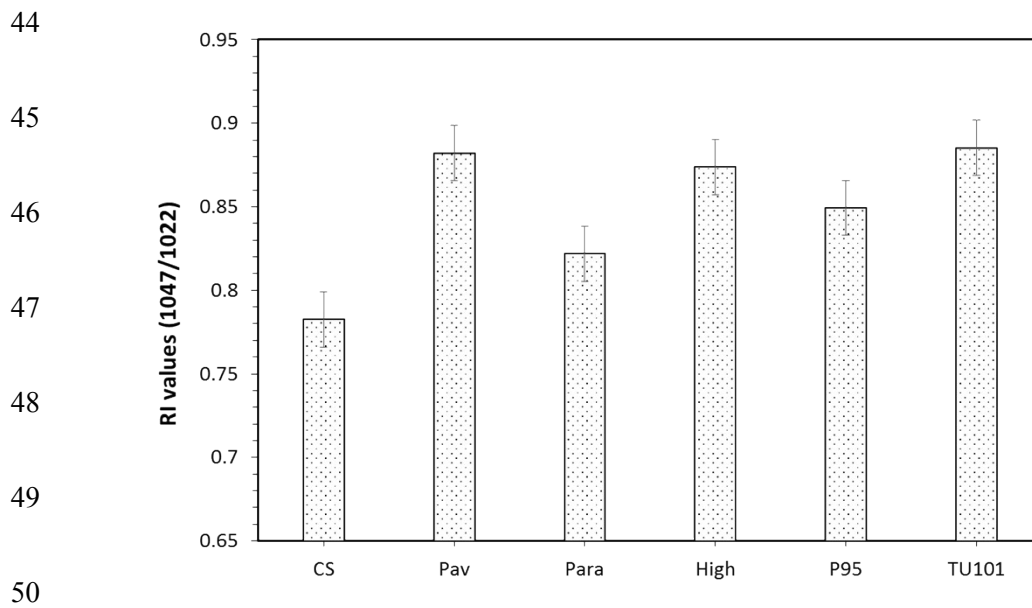

51 **Figure S3:** IR ratio of the absorbances  $1047/1020\text{ cm}^{-1}$  for different wheat flours. IR ratio was  
 52 calculated by extracting IR absorbance values at  $1047$  and  $1022\text{ cm}^{-1}$  from the vector  
 53 normalised spectra after water subtraction, baseline correction and deconvolution. The bands  
 54 at  $1047$  and  $1022\text{ cm}^{-1}$  generally associated with the ordered and amorphous structures of  
 55 starch, respectively. The ratio of absorbance can be used to quantify the degree of “order” in  
 56 starch [ordered starch] samples (VanSoest et al., 1995).

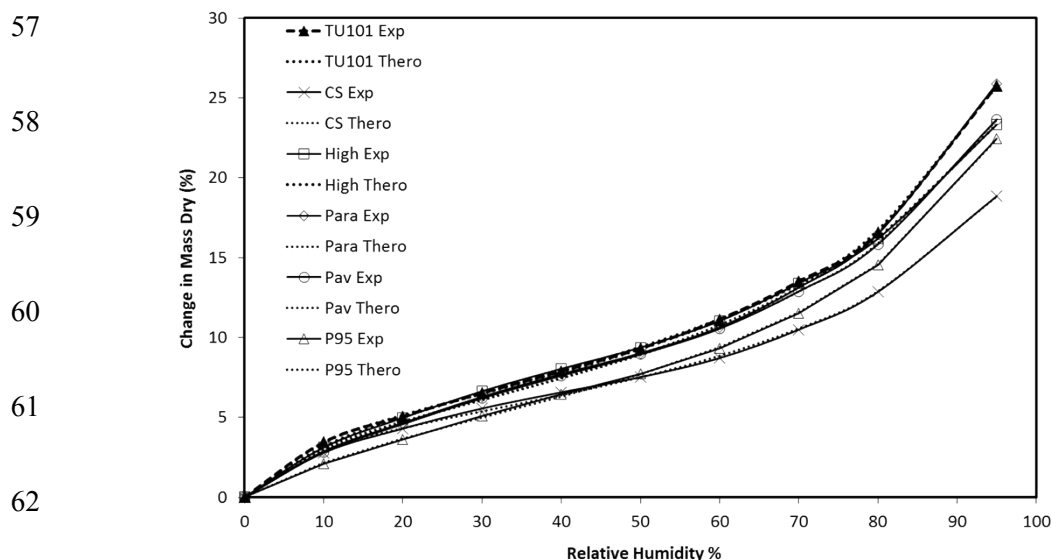

63 **Figure S4:** GAB model fitting of sorption data for all wheat flours. The experimental sorption  
 64 data have been fitted with the three-parameter GAB model (Guggenheim-Andersen-de Boer  
 65 model). There is good agreement between experimental data and predicted values ( $R^2 =$   
 66  $0.997$ ).

67

68

69

70

71

72

73

74

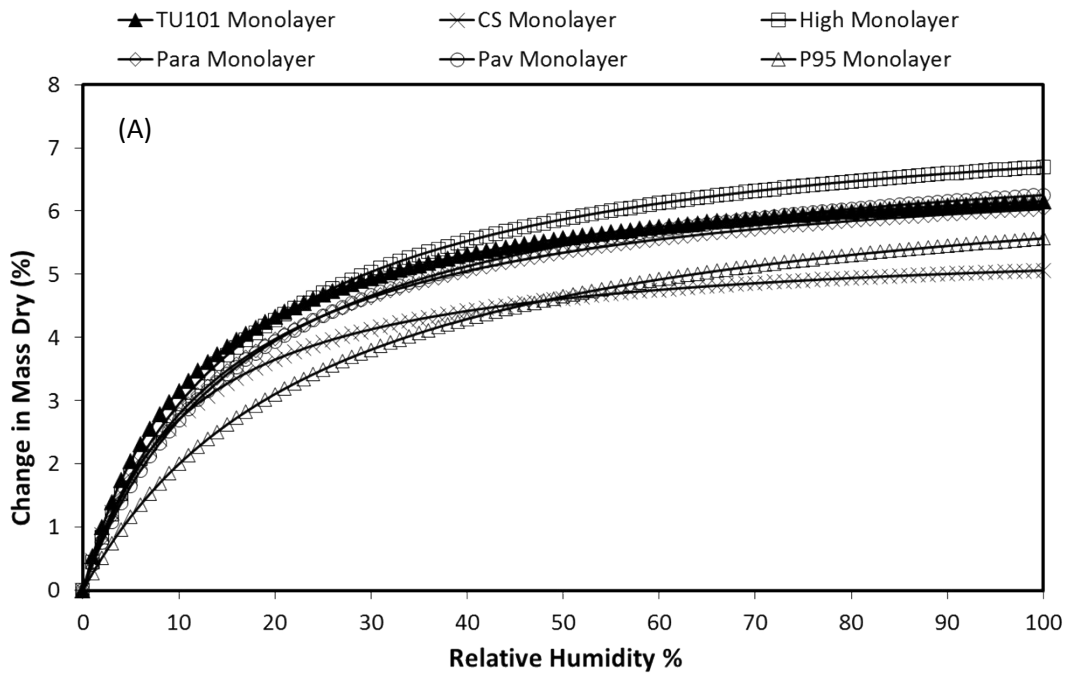

75

76

77

78

79

80

81

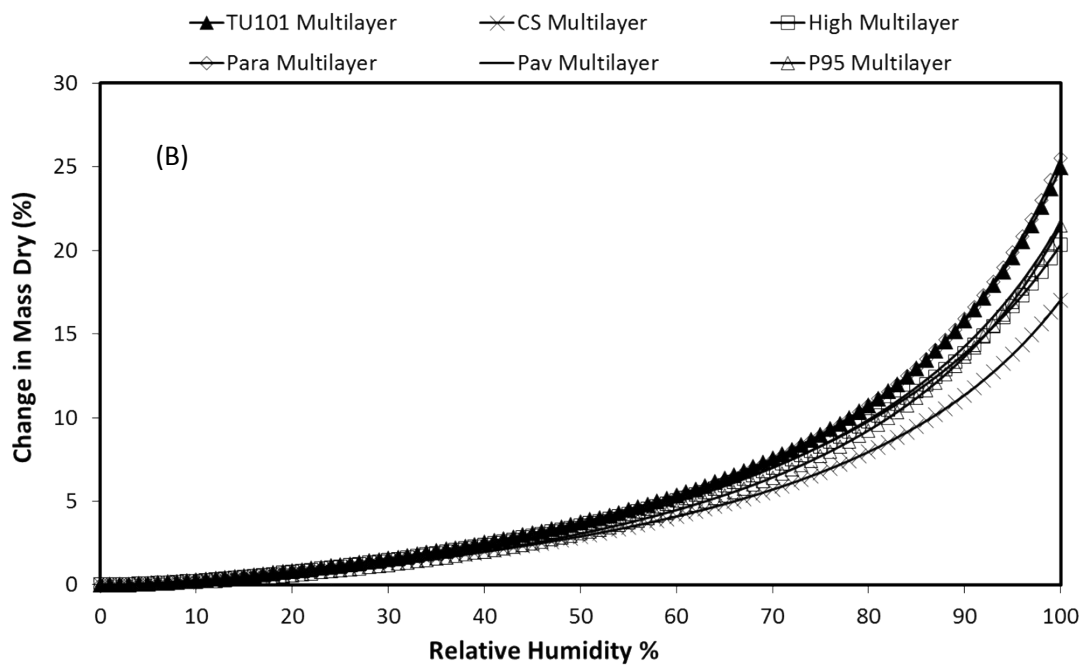

82 **Figure S5:** GAB model fitting of sorption data for all wheat flours, (a) Monolayer sorption,

83 and (b) Multilayer sorption.
